# Supplementary material for: Synthesis, structure and reactivity study of magnesium amidinato complexes derived from carbodiimides and N,N′-bis(2,6-diisopropylphenyl)-1,4-diaza-butadiene ligands
Source: Royal Society of Chemistry journal article supplement (doi:10.1039/c4dt03074e), 2014-11-04
Supplement: c4dt03074e1.pdf [file c4dt03074e1.pdf]

Supporting Information

Synthesis, Structure and Reactivity Study of Magnesium Amidinato Complexes Derived from Carbodiimides and *N,N'*-Bis(2,6-diisopropylphenyl)-1,4-diaza-butadiene Ligands

Srinivas Anga,<sup>a</sup> Jayeeta Bhattacharjee,<sup>a</sup> Adimulam Harinath,<sup>a</sup> and Tarun K. Panda<sup>\*a</sup>

Table 1. Crystallographic details and refinement parameters of compounds 1-7.

| Crystal                                                      | 1                                                              | 2                                                              | 3                                                  | 4                                                  |
|--------------------------------------------------------------|----------------------------------------------------------------|----------------------------------------------------------------|----------------------------------------------------|----------------------------------------------------|
| CCDC No.                                                     | 1019669                                                        | 1019670                                                        | 1019671                                            | 1019672                                            |
| Empirical formula                                            | C <sub>54</sub> H <sub>72</sub> Mg <sub>2</sub> N <sub>4</sub> | C <sub>42</sub> H <sub>56</sub> Mg <sub>2</sub> N <sub>4</sub> | C <sub>32</sub> H <sub>50</sub> MgN <sub>4</sub>   | C <sub>73</sub> H <sub>94</sub> MgN <sub>4</sub>   |
| Formula weight                                               | 825.78                                                         | 665.53                                                         | 515.07                                             | 1051.83                                            |
| <i>T</i> (K)                                                 | 120                                                            | 120                                                            | 120                                                | 120                                                |
| $\lambda$ (Å)                                                | 0.71069                                                        | 0.71069                                                        | 0.71069                                            | 0.71069                                            |
| Crystal system                                               | Monoclinic                                                     | Monoclinic                                                     | Orthorhombic                                       | Monoclinic                                         |
| Space group                                                  | <i>P</i> 2 <sub>1</sub> / <i>c</i>                             | <i>P</i> 2 <sub>1</sub> / <i>c</i>                             | <i>P</i> <i>b c a</i>                              | <i>C</i> 2/ <i>c</i>                               |
| <i>a</i> (Å)                                                 | 12.618(5)                                                      | 12.896 (5)                                                     | 20.441(5)                                          | 17.809(5)                                          |
| <i>b</i> (Å)                                                 | 11.279(5)                                                      | 16.810 (5)                                                     | 11.399(5)                                          | 19.577(5)                                          |
| <i>c</i> (Å)                                                 | 19.871(5)                                                      | 16.810 (5)                                                     | 27.842(5)                                          | 17.603(5)                                          |
| $\alpha$ (°)                                                 | 90                                                             | 90                                                             | 90                                                 | 90                                                 |
| $\beta$ (°)                                                  | 122.834(15)                                                    | 105.741(5)                                                     | 90                                                 | 98.479(5)                                          |
| $\gamma$ (°)                                                 | 90                                                             | 90                                                             | 90                                                 | 90                                                 |
| <i>V</i> (Å <sup>3</sup> )                                   | 2376.2(15)                                                     | 3883(2)                                                        | 6487(3)                                            | 6070(3)                                            |
| <i>Z</i>                                                     | 2                                                              | 4                                                              | 8                                                  | 4                                                  |
| <i>D</i> <sub>calc</sub> g cm <sup>-3</sup>                  | 1.153                                                          | 1.138                                                          | 1.055                                              | 1.151                                              |
| $\mu$ (mm <sup>-1</sup> )                                    | 0.090                                                          | 0.095                                                          | 0.079                                              | 0.075                                              |
| <i>F</i> (000)                                               | 896                                                            | 1440                                                           | 2256                                               | 2288                                               |
| Theta range for data collection                              | 3.04 to 27.44 deg.                                             | 3.15 to 30.44 deg.                                             | 3.00 to 27.5 deg                                   | 3.04 to 30.45 deg.                                 |
| Reflections collected / unique                               | 37443 / 5407                                                   | 95565 / 11748                                                  | 60136 / 7404                                       | 61348 / 9204                                       |
|                                                              | [ <i>R</i> (int) = 0.0857]                                     | [ <i>R</i> (int) = 0.0407]                                     | [ <i>R</i> (int) = 0.0646]                         | [ <i>R</i> (int) = 0.0392]                         |
| Completeness to theta = 71.25                                | 99.7 %                                                         | 99.5 %                                                         | 99.7 %                                             | 99.8 %                                             |
| Absorption correction                                        | Multi-scan                                                     | Multi-scan                                                     | Multi-scan                                         | Multi-scan                                         |
| Max. and min. transmission                                   | 0.9848 and 0.9777                                              | 0.978 and 0.973                                                | 0.988 and 0.980                                    | 0.986 and 0.979                                    |
| Refinement method                                            | Full-matrix least-squares on <i>F</i> <sup>2</sup>             | Full-matrix least-squares on <i>F</i> <sup>2</sup>             | Full-matrix least-squares on <i>F</i> <sup>2</sup> | Full-matrix least-squares on <i>F</i> <sup>2</sup> |
| Data / restraints / parameters                               | 5407 / 0 / 271                                                 | 11748 / 0 / 441                                                | 7404 / 0 / 346                                     | 9204 / 0 / 363                                     |
| Goodness-of-fit on <i>F</i> <sup>2</sup>                     | 1.047                                                          | 1.078                                                          | 1.059                                              | 0.945                                              |
| Final <i>R</i> indices [ <i>I</i> > 2 $\sigma$ ( <i>I</i> )] | <i>R</i> 1 = 0.0460,<br>w <i>R</i> 2 = 0.1064                  | <i>R</i> 1 = 0.0415,<br>w <i>R</i> 2 = 0.1043                  | <i>R</i> 1 = 0.0939,<br>w <i>R</i> 2 = 0.2485      | <i>R</i> 1 = 0.0462,<br>w <i>R</i> 2 = 0.1276      |
| <i>R</i> indices (all data)                                  | <i>R</i> 1 = 0.0633,<br>w <i>R</i> 2 = 0.1166                  | <i>R</i> 1 = 0.0527,<br>w <i>R</i> 2 = 0.1121                  | <i>R</i> 1 = 0.2029,<br>w <i>R</i> 2 = 0.2439      | <i>R</i> 1 = 0.0557,<br>w <i>R</i> 2 = 0.1356      |
| Absolute structure parameter Largest diff. peak and hole     | 0.428 and -0.229 e. Å <sup>-3</sup>                            | 0.396 and -0.272 e. Å <sup>-3</sup>                            | 0.421 and -0.466 e. Å <sup>-3</sup>                | 0.519 and -0.255 e. Å <sup>-3</sup>                |

**Table 1 (contd).** Crystallographic details and refinement parameters of compounds 1-7.

| Crystal                                                  | 5                                                | 6                                                | 7                                                                              |
|----------------------------------------------------------|--------------------------------------------------|--------------------------------------------------|--------------------------------------------------------------------------------|
| CCDC No.                                                 | 1019673                                          | 1019674                                          | 1019675                                                                        |
| Empirical formula                                        | C <sub>54</sub> H <sub>72</sub> MgN <sub>6</sub> | C <sub>50</sub> H <sub>64</sub> MgN <sub>4</sub> | C <sub>94</sub> H <sub>116</sub> Mg <sub>2</sub> N <sub>4</sub> O <sub>2</sub> |
| Formula weight                                           | 829.49                                           | 745.36                                           | 1382.53                                                                        |
| <i>T</i> (K)                                             | 120                                              | 120                                              | 120                                                                            |
| $\lambda$ (Å)                                            | 0.71069                                          | 0.71069                                          | 0.71069                                                                        |
| Crystal system                                           | Triclinic                                        | Monoclinic                                       | Triclinic                                                                      |
| Space group                                              | <i>P</i> -1                                      | <i>P</i> 2 <sub>1</sub> / <i>c</i>               | <i>P</i> -1                                                                    |
| <i>a</i> (Å)                                             | 11.569(5)                                        | 15.311(5)                                        | 11.523(5)                                                                      |
| <i>b</i> (Å)                                             | 12.971(5)                                        | 16.053(5)                                        | 12.684(5)                                                                      |
| <i>c</i> (Å)                                             | 16.674(5)                                        | 18.041(5)                                        | 15.762(5)                                                                      |
| $\alpha$ (°)                                             | 100.146(5)                                       | 90                                               | 79.062(5)                                                                      |
| $\beta$ (°)                                              | 93.771(5)                                        | 92.921(5)                                        | 73.256(5)                                                                      |
| $\gamma$ (°)                                             | 100.240(5)                                       | 90                                               | 67.014(5)                                                                      |
| <i>V</i> (Å <sup>3</sup> )                               | 2411.6(16)                                       | 4428(2)                                          | 2023.1(13)                                                                     |
| <i>Z</i>                                                 | 2                                                | 4                                                | 1                                                                              |
| <i>D</i> <sub>calc</sub> g cm <sup>-3</sup>              | 1.139                                            | 1.118                                            | 1.135                                                                          |
| $\mu$ (mm <sup>-1</sup> )                                | 0.079                                            | 0.078                                            | 0.080                                                                          |
| <i>F</i> (000)                                           | 896                                              | 1616                                             | 748                                                                            |
| Theta range for data collection                          | 3.13 to 30.48 deg.                               | 3.06 to 30.48 deg.                               | 3.07 to 30.48 deg.                                                             |
| Reflections collected / unique                           | 49598 / 14648                                    | 85075 / 134237                                   | 41678 / 12266                                                                  |
|                                                          | [R(int) = 0.0556]                                | [R(int) = 0.1234]                                | [R(int) = 0.0815]                                                              |
| Completeness to theta = 71.25                            | 99.5 %                                           | 99.5 %                                           | 99.4 %                                                                         |
| Absorption correction                                    | Multi-scan                                       | Multi-scan                                       | Multi-scan                                                                     |
| Max. and min. transmission                               | 0.9875 and 0.9837                                | 0.988 and 0.982                                  | 0.986 and 0.981                                                                |
| Refinement method                                        | Full-matrix least-squares on F <sup>2</sup>      | Full-matrix least-squares on F <sup>2</sup>      | Full-matrix least-squares on F <sup>2</sup>                                    |
| Data / restraints / parameters                           | 14648 / 0 / 558                                  | 13423 / 0 / 508                                  | 12266 / 0 / 469                                                                |
| Goodness-of-fit on F <sup>2</sup>                        | 0.989                                            | 1.024                                            | 1.155                                                                          |
| Final R indices [I>2sigma(I)]                            | R1 = 0.0925,<br>wR2 = 0.1705                     | R1 = 0.0822,<br>wR2 = 0.2295                     | R1 = 0.0688,<br>wR2 = 0.1703                                                   |
| R indices (all data)                                     | R1 = 0.0903,<br>wR2 = 0.2408                     | R1 = 0.0897,<br>wR2 = 0.2497                     | R1 = 0.1286,<br>wR2 = 0.2386                                                   |
| Absolute structure parameter Largest diff. peak and hole | 0.499 and -0.381 e. Å <sup>-3</sup>              | 1.447 and -0.631 e. Å <sup>-3</sup>              | 0.456 and -0.482 e. Å <sup>-3</sup>                                            |
